# Supplementary material for: The role of the A monovalent cation in the AVF3 perovskite series. A quantum mechanical investigation
Source: Royal Society of Chemistry journal article supplement (doi:10.1039/d3cp00181d), 2023-01-01
Supplement: d3cp00181d1.pdf [file d3cp00181d1.pdf]

## The role of the A monovalent cation in the $AVF_3$ perovskite series. A quantum mechanical investigation.

Fabien Pascale,<sup>1</sup> Neveen I. Atallah,<sup>2</sup> Khaled E. El-Kelany,<sup>2</sup> Klaus Doll,<sup>3</sup> and Roberto Dovesi<sup>4</sup>

<sup>1</sup>*Université de Lorraine - Nancy, CNRS, Laboratoire de Physique et Chimie Théoriques, UMR 7019, Vandoeuvre-les-Nancy, France<sup>a)</sup>*

<sup>2</sup>*Institute of Nanoscience and Nanotechnology, Kafrelsheikh University, 33516 Kafr El-Sheikh, Egypt*

<sup>3</sup>*Institute of Theoretical Chemistry, Molpro Quantum Chemistry Software, University of Stuttgart, Stuttgart, Germany*

<sup>4</sup>*Dipartimento di Chimica, Università di Torino and NIS (Nanostructured Interfaces and Surfaces) Centre, Via P. Giuria 5, 10125 Torino, Italy*

(Dated: 4 April 2023)

Keywords: perovskites, octahedra rotation, cubic, tetragonal, orthorhombic and monoclinic phases, relative stability, cell volume reduction, ferromagnetic and anti-ferromagnetic solutions.

In this section, complementary material for the discussion in the main text is provided:

1. Table I provides the contribution of the polarization functions on the 5 A cations. For Li, Na, and K, then, the effect of adding a d shell is shown. For Rb and Cs, the energy lowering is due to the addition of a f shell. For Li, Na and K the d shell is added both in the cubic (Cs and Rb), and in the tetragonal (K) or orthorhombic (Li, Na) equilibrium geometries. Data refer to B3LYP, FM solution. In all cases the added shell contains a single Gaussian. The exponent of the polarization function has been optimized in the bulk.
2. Tables II, III, IV, V VI show the optimized Li, Na, K, Rb and Cs basis sets; the optimization is

performed in the bulk, with B3LYP, for the FM solution. The V and F basis set has been optimized in  $KVF_3$  bulk, and used as such for the other four systems.

3. Table VII reports the core and valence (and the lowest conduction) eigenvalues for the three kinds of atoms of the five systems, evaluated with B3LYP for the FM solution, at the equilibrium geometry of the most stable structure: cubic (Rb, Cs), or tetragonal (K), or orthorhombic (Na, Li). The width of the bands ( $\delta$ ) and the energy difference between the  $\alpha$  and  $\beta$  eigenvalues ( $\Delta$ ) is also shown. Obviously, most of the *bands* are actually levels with width smaller than 0.1 eV.

All tables are referred to and commented in the main text.

---

<sup>a)</sup>Electronic mail: fabien.pascale@univ-lorraine.fr

TABLE I. Effect of adding d (A=Li, Na, K) and f (Rb and Cs) polarization orbitals.  $\Delta E$  is the total energy difference obtained with and without the polarization functions at fixed optimized geometry. The data to the left refer to the cubic structure; to the right, to the most stable space group (see text). The exponents of the optimized polarization shell is shown in the following tables. Q is the Mulliken population of the polarization shell. Energies are in  $E_h$ ,  $\Delta E$  in  $\mu E_h$ . Population in  $|e|$ .

|    | Pm $\bar{3}$ (221) |       |            | Pnma (62)    |       |            |
|----|--------------------|-------|------------|--------------|-------|------------|
|    | E                  | Q     | $\Delta E$ | E            | Q     | $\Delta E$ |
| Li | -1251.276144       | 0.007 | -1.3       | -1251.324773 | 0.021 | -1.0       |
| Na | -1406.053857       | 0.013 | -2.1       | -1406.072297 | 0.017 | -1.3       |
| K  | -1843.669071       | 0.038 | -5.9       | -1843.669146 | 0.039 | -5.8       |
| Rb | -4183.658627       | 0.004 | -0.9       |              |       |            |
| Cs | -8800.175405       | 0.007 | -1.9       |              |       |            |

TABLE II. The K, V and F basis sets optimized (numerically) in  $\text{KVF}_3$ . The optimization process stops when a full cycle of optimization lowers the total energy of the bulk by less than  $1 \mu E_h$ ; optimization performed for space group P6mm (four formula units).

|    |   |   |   |              |          |          |
|----|---|---|---|--------------|----------|----------|
| 19 | 6 | 0 | 0 | 8            | 2.0      | 1.0000   |
|    |   |   |   | 170602.10967 | 0.00022  |          |
|    |   |   |   | 23423.76869  | 0.00201  |          |
|    |   |   |   | 4918.08613   | 0.01147  |          |
|    |   |   |   | 1305.24945   | 0.04985  |          |
|    |   |   |   | 404.40909    | 0.16260  |          |
|    |   |   |   | 142.61932    | 0.35178  |          |
|    |   |   |   | 55.32332     | 0.40572  |          |
|    |   |   |   | 22.35979     | 0.14772  |          |
|    |   | 0 | 1 | 6            | 8.0      | 1.0000   |
|    |   |   |   | 471.67766    | -0.00467 | 0.00626  |
|    |   |   |   | 113.04226    | -0.05669 | 0.04548  |
|    |   |   |   | 36.60891     | -0.14039 | 0.17447  |
|    |   |   |   | 13.65432     | 0.21493  | 0.37601  |
|    |   |   |   | 5.42563      | 0.71855  | 0.41160  |
|    |   |   |   | 2.02585      | 0.32366  | 0.16604  |
|    |   | 0 | 1 | 5            | 8.0      | 1.0000   |
|    |   |   |   | 18.87356     | -0.00342 | -0.02775 |
|    |   |   |   | 6.48435      | -0.27631 | -0.06849 |
|    |   |   |   | 2.78914      | -0.60990 | 0.24189  |
|    |   |   |   | 1.15389      | 1.07001  | 1.38192  |
|    |   |   |   | 0.42253      | 1.18745  | 1.27860  |
|    |   | 0 | 1 | 1            | 0.0      | 1.0000   |
|    |   |   |   | 0.51160      | 1.00000  | 1.00000  |
|    |   | 0 | 1 | 1            | 0.0      | 1.0000   |
|    |   |   |   | 0.15452      | 1.00000  | 1.00000  |
|    |   | 0 | 3 | 1            | 0.0      | 1.0000   |
|    |   |   |   | 0.30473      | 1.00000  |          |
| 23 | 7 | 0 | 0 | 8            | 2.0      | 1.0000   |
|    |   |   |   | 243610.31337 | 0.00023  |          |
|    |   |   |   | 33706.54271  | 0.00204  |          |
|    |   |   |   | 7132.80340   | 0.01157  |          |
|    |   |   |   | 1906.39231   | 0.04990  |          |
|    |   |   |   | 592.63885    | 0.16306  |          |
|    |   |   |   | 209.18489    | 0.35407  |          |
|    |   |   |   | 81.52253     | 0.40504  |          |
|    |   |   |   | 33.04397     | 0.14371  |          |
|    |   | 0 | 1 | 6            | 8.0      | 1.0000   |
|    |   |   |   | 714.98240    | -0.00449 | 0.00660  |
|    |   |   |   | 171.50341    | -0.05530 | 0.04806  |
|    |   |   |   | 56.07125     | -0.14050 | 0.18607  |
|    |   |   |   | 21.21413     | 0.19583  | 0.40012  |
|    |   |   |   | 8.74267      | 0.70802  | 0.41590  |
|    |   |   |   | 3.60772      | 0.29757  | 0.13522  |
|    |   | 0 | 1 | 4            | 8.0      | 1.0000   |
|    |   |   |   | 34.02706     | 0.01132  | -0.02251 |
|    |   |   |   | 11.21250     | -0.30640 | -0.08367 |
|    |   |   |   | 4.81204      | -0.76077 | 0.23245  |
|    |   |   |   | 2.04920      | 1.13284  | 1.22344  |
|    |   | 0 | 1 | 1            | 0.0      | 1.0000   |
|    |   |   |   | 0.85592      | 1.00000  | 1.00000  |
|    |   | 0 | 1 | 1            | 0.0      | 1.0000   |
|    |   |   |   | 0.32795      | 1.00000  | 1.00000  |
|    |   | 0 | 3 | 4            | 3.0      | 1.0000   |
|    |   |   |   | 23.97650     | 0.03669  |          |
|    |   |   |   | 6.47729      | 0.18401  |          |
|    |   |   |   | 2.12869      | 0.42845  |          |
|    |   |   |   | 0.72089      | 0.51429  |          |
|    |   | 0 | 3 | 1            | 0.0      | 1.0000   |
|    |   |   |   | 0.23477      | 1.00000  |          |
| 9  | 4 | 0 | 0 | 7            | 2.0      | 1.0000   |
|    |   |   |   | 10139.60067  | 0.00110  |          |
|    |   |   |   | 1517.42324   | 0.00850  |          |
|    |   |   |   | 348.08291    | 0.04183  |          |
|    |   |   |   | 100.56220    | 0.14604  |          |
|    |   |   |   | 33.74770     | 0.33609  |          |
|    |   |   |   | 12.83710     | 0.40569  |          |
|    |   |   |   | 5.27944      | 0.16871  |          |
|    |   | 0 | 1 | 3            | 8.0      | 1.0000   |
|    |   |   |   | 39.45194     | -0.06901 | 0.07752  |
|    |   |   |   | 9.17932      | -0.39853 | 0.45487  |
|    |   |   |   | 2.75061      | 0.48002  | 1.30646  |
|    |   | 0 | 1 | 1            | 0.0      | 1.0000   |
|    |   |   |   | 0.86820      | 1.00000  | 1.00000  |
|    |   | 0 | 1 | 1            | 0.0      | 1.0000   |
|    |   |   |   | 0.24838      | 1.00000  | 1.00000  |

TABLE III. The Li basis set optimized in  $\text{LiVF}_3$ 

|     |            |         |         |
|-----|------------|---------|---------|
| 3 4 |            |         |         |
| 0 0 | 5          | 2.0     | 1.0000  |
|     | 1207.38010 | 0.00155 |         |
|     | 201.18462  | 0.00992 |         |
|     | 45.76816   | 0.05585 |         |
|     | 11.54912   | 0.24230 |         |
|     | 3.11940    | 0.66414 |         |
| 0 1 | 1          | 0.0     | 1.0000  |
|     | 0.87435    | 1.00000 | 1.00000 |
| 0 1 | 1          | 0.0     | 1.0000  |
|     | 0.14960    | 1.00000 | 1.00000 |
| 0 3 | 1          | 0.0     | 1.0000  |
|     | 0.40845    | 1.00000 |         |

TABLE IV. The Na basis set optimized in  $\text{NaVF}_3$ 

|      |             |          |         |
|------|-------------|----------|---------|
| 11 5 |             |          |         |
| 0 0  | 8           | 2.0      | 1.0000  |
|      | 55701.72042 | 0.00023  |         |
|      | 7945.78669  | 0.00194  |         |
|      | 1683.28885  | 0.01119  |         |
|      | 439.65696   | 0.05018  |         |
|      | 133.30567   | 0.16677  |         |
|      | 45.99796    | 0.36134  |         |
|      | 17.66780    | 0.40167  |         |
|      | 7.22365     | 0.14933  |         |
| 0 1  | 5           | 8.0      | 1.0000  |
|      | 108.46506   | -0.00738 | 0.00871 |
|      | 26.10566    | -0.07257 | 0.05648 |
|      | 8.40948     | -0.08722 | 0.18921 |
|      | 3.10995     | 0.31845  | 0.35247 |
|      | 1.20577     | 0.61033  | 0.38252 |
| 0 1  | 1           | 0.0      | 1.0000  |
|      | 0.46702     | 1.00000  | 1.00000 |
| 0 1  | 1           | 0.0      | 1.0000  |
|      | 0.11512     | 1.00000  | 1.00000 |
| 0 3  | 1           | 0.0      | 1.0000  |
|      | 0.35851     | 1.00000  |         |

TABLE V. The Rb basis set optimized in RbVF<sub>3</sub>

|    |    |               |           |          |
|----|----|---------------|-----------|----------|
| 37 | 10 |               |           |          |
| 0  | 0  | 8             | 2.0       | 1.0000   |
|    |    | 2850858.11809 | 0.00003   |          |
|    |    | 415753.92550  | 0.00030   |          |
|    |    | 71313.36763   | 0.00255   |          |
|    |    | 15645.53008   | 0.01409   |          |
|    |    | 4206.42720    | 0.06098   |          |
|    |    | 1279.89992    | 0.20518   |          |
|    |    | 422.60980     | 0.44897   |          |
|    |    | 146.09441     | 0.38337   |          |
| 0  | 1  | 6             | 8.0       | 1.0000   |
|    |    | 4625.18760    | -0.00033  | 0.00169  |
|    |    | 1083.11959    | -0.01075  | 0.01465  |
|    |    | 341.74990     | -0.07128  | 0.07645  |
|    |    | 125.29215     | -0.12744  | 0.25406  |
|    |    | 49.98883      | 0.35681   | 0.48209  |
|    |    | 20.61764      | 0.77457   | 0.38454  |
| 0  | 1  | 5             | 8.0       | 1.0000   |
|    |    | 75.50906      | 0.00116   | -0.01604 |
|    |    | 21.23088      | -0.05942  | -0.07551 |
|    |    | 16.67282      | -0.04588  | 0.14150  |
|    |    | 8.08641       | 352.52995 | 0.62583  |
|    |    | 5.32950       | 106.92995 | 0.61211  |
| 0  | 1  | 3             | 8.0       | 1.0000   |
|    |    | 7.11540       | 0.74932   | -0.45559 |
|    |    | 2.66216       | 0.19118   | 0.19639  |
|    |    | 1.46383       | 0.02213   | 0.06671  |
| 0  | 1  | 1             | 0.0       | 1.0000   |
|    |    | 0.72691       | 1.00000   | 1.00000  |
| 0  | 1  | 1             | 0.0       | 1.0000   |
|    |    | 0.25325       | 1.00000   | 1.00000  |
| 0  | 3  | 5             | 10.0      | 1.0000   |
|    |    | 250.04613     | 0.00610   |          |
|    |    | 72.91736      | 0.04837   |          |
|    |    | 26.51837      | 0.19051   |          |
|    |    | 10.46395      | 0.41558   |          |
|    |    | 4.13361       | 0.47976   |          |
| 0  | 3  | 1             | 0.0       | 1.0000   |
|    |    | 1.57935       | 0.99925   |          |
| 0  | 3  | 1             | 0.0       | 1.0000   |
|    |    | 0.49255       | 0.99925   |          |
| 0  | 4  | 1             | 0.0       | 1.0000   |
|    |    | 0.46697       | 1.00000   |          |

TABLE VI. The Cs basi set optimized in CsVF<sub>3</sub>

|       |               |          |          |  |
|-------|---------------|----------|----------|--|
| 55 11 |               |          |          |  |
| 0 0   | 9             | 2.0      | 1.0000   |  |
|       | 5371058.30078 | 0.00005  |          |  |
|       | 780235.96199  | 0.00040  |          |  |
|       | 166217.96247  | 0.00238  |          |  |
|       | 43056.24088   | 0.01130  |          |  |
|       | 12690.32695   | 0.04565  |          |  |
|       | 4128.37094    | 0.15065  |          |  |
|       | 1472.59933    | 0.35821  |          |  |
|       | 570.80952     | 0.48513  |          |  |
|       | 232.15700     | 0.23063  |          |  |
| 0 1   | 7             | 8.0      | 1.0000   |  |
|       | 14813.73771   | -0.00037 | 0.00115  |  |
|       | 3459.82498    | -0.00650 | 0.01026  |  |
|       | 1091.07743    | -0.05024 | 0.05724  |  |
|       | 401.23611     | -0.14503 | 0.21166  |  |
|       | 165.00542     | 0.06736  | 0.47093  |  |
|       | 74.12614      | 0.66416  | 0.52596  |  |
|       | 34.75478      | 0.50279  | 0.22665  |  |
| 0 1   | 6             | 8.0      | 1.0000   |  |
|       | 362.87245     | 0.00616  | -0.01286 |  |
|       | 139.34470     | -0.02466 | -0.06984 |  |
|       | 56.94712      | -0.30068 | -0.00730 |  |
|       | 26.91024      | -0.09427 | 0.77239  |  |
|       | 12.80035      | 0.86557  | 1.36381  |  |
|       | 6.28899       | 0.59226  | 0.53691  |  |
| 0 3   | 6             | 10.0     | 1.0000   |  |
|       | 444.19163     | 0.01298  |          |  |
|       | 133.01663     | 0.09115  |          |  |
|       | 50.23551      | 0.29264  |          |  |
|       | 21.15547      | 0.45088  |          |  |
|       | 9.49038       | 0.30392  |          |  |
|       | 4.13882       | 0.05614  |          |  |
| 0 1   | 3             | 8.0      | 1.0000   |  |
|       | 10.22516      | 0.55576  | -0.12044 |  |
|       | 6.16664       | 0.24266  | 0.25117  |  |
|       | 3.54524       | 0.04065  | 0.29157  |  |
| 0 3   | 3             | 10.0     | 1.0000   |  |
|       | 8.30737       | 0.19298  |          |  |
|       | 3.35715       | 0.54189  |          |  |
|       | 1.34214       | 0.42631  |          |  |
| 0 3   | 1             | 0.0      | 1.0000   |  |
|       | 0.45394       | 1.00000  |          |  |
| 0 1   | 3             | 8.0      | 1.0000   |  |
|       | 7.35954       | 0.10108  | 0.02690  |  |
|       | 2.59709       | 0.88418  | 0.37490  |  |
|       | 1.26647       | 0.61672  | 0.24353  |  |
| 0 1   | 1             | 0.0      | 1.0000   |  |
|       | 0.47820       | 1.00000  | 1.00000  |  |
| 0 1   | 1             | 0.0      | 1.0000   |  |
|       | 0.17933       | 1.00000  | 1.00000  |  |
| 0 4   | 1             | 0.0      | 1.0000   |  |
|       | 0.45425       | 1.00000  |          |  |

|       | Li      |          |          | Na      |          |          | K       |          |          | Rb       |          |          | Cs       |          |          |
|-------|---------|----------|----------|---------|----------|----------|---------|----------|----------|----------|----------|----------|----------|----------|----------|
|       | $E_a$   | $\delta$ | $\Delta$ | $E_a$   | $\delta$ | $\Delta$ | $E_a$   | $\delta$ | $\Delta$ | $E_a$    | $\delta$ | $\Delta$ | $E_a$    | $\delta$ | $\Delta$ |
| Cs 1s |         |          |          |         |          |          |         |          |          |          |          |          | -34305.5 | 0.0      | 0.0      |
| Rb 1s |         |          |          |         |          |          |         |          |          | -14790.2 | 0.0      | 0.0      |          |          |          |
| V 1s  | -5350.8 | 0.0      | 0.0      | -5350.9 | 0.0      | 0.0      | -5350.9 | 0.0      | 0.0      | -5351.1  | 0.0      | 0.0      | -5350.9  | 0.0      | 0.0      |
| K 1s  |         |          |          |         |          |          | -3525.9 | 0.0      | 0.0      |          |          |          |          |          |          |
| Cs 2s |         |          |          |         |          |          |         |          |          |          |          |          | -5254.6  | 0.0      | 0.0      |
| Cs 2p |         |          |          |         |          |          |         |          |          |          |          |          | -4949.6  | 0.0      | 0.0      |
| Na 1s |         |          |          | -1040.8 | 0.0      | 0.0      |         |          |          |          |          |          |          |          |          |
| Rb 2s |         |          |          |         |          |          |         |          |          | -1956.8  | 0.0      | 0.0      |          |          |          |
| Rb 2p |         |          |          |         |          |          |         |          |          | -1775.7  | 0.0      | 0.0      |          |          |          |
| Cs 3s |         |          |          |         |          |          |         |          |          |          |          |          | -1093.9  | 0.0      | 0.0      |
| Cs 3p |         |          |          |         |          |          |         |          |          |          |          |          | -963.7   | 0.0      | 0.0      |
| Cs 3d |         |          |          |         |          |          |         |          |          |          |          |          | -721.9   | 0.0      | 0.0      |
| F 1s  | -666.0  | 0.3      | 0.0      | -665.8  | 0.0      | 0.0      | -665.7  | 0.0      | 0.0      | -665.6   | 0.0      | 0.0      | -665.0   | 0.0      | 0.0      |
| V 2s  | -599.0  | 0.0      | 1.0      | -599.0  | 0.0      | 1.0      | -599.0  | 0.0      | 1.0      | -599.0   | 0.0      | 1.0      | -599.0   | 0.0      | 1.0      |
| V 2p  | -503.7  | 0.0      | 0.8      | -503.8  | 0.0      | 0.8      | -503.8  | 0.0      | 0.8      | -503.8   | 0.0      | 0.8      | -503.8   | 0.0      | 0.8      |
| Rb 3s |         |          |          |         |          |          |         |          |          | -289.1   | 0.0      | 0.0      |          |          |          |
| K 2s  |         |          |          |         |          |          | -353.8  | 0.0      | 0.0      |          |          |          |          |          |          |
| K 2p  |         |          |          |         |          |          | -281.4  | 0.0      | 0.0      |          |          |          |          |          |          |
| Rb 3p |         |          |          |         |          |          |         |          |          | -223.9   | 0.0      | 0.0      |          |          |          |
| Cs 4s |         |          |          |         |          |          |         |          |          |          |          |          | -203.1   | 0.0      | 0.0      |
| Cs 4p |         |          |          |         |          |          |         |          |          |          |          |          | -155.8   | 0.0      | 0.0      |
| Rb 3d |         |          |          |         |          |          |         |          |          | -105.2   | 0.0      | 0.0      |          |          |          |
| Cs 4d |         |          |          |         |          |          |         |          |          |          |          |          | -73.5    | 0.0      | 0.0      |
| Na 2s |         |          |          | -54.9   | 0.0      | 0.0      |         |          |          |          |          |          |          |          |          |
| Li 1s | -48.5   | 0.0      | 0.0      |         |          |          |         |          |          |          |          |          |          |          |          |
| V 3s  | -66.5   | 0.0      | 3.2      | -66.5   | 0.0      | 3.2      | -66.5   | 0.0      | 3.2      | -66.5    | 0.0      | 3.2      | -66.5    | 0.0      | 3.2      |
| V 3p  | -40.3   | 0.1      | 3.2      | -40.3   | 0.1      | 3.3      | -40.3   | 0.0      | 3.3      | -40.3    | 0.0      | 3.4      | -40.2    | 0.0      | 3.4      |
| K 3s  |         |          |          |         |          |          | -32.2   | 0.0      | 0.0      |          |          |          |          |          |          |
| Rb 4s |         |          |          |         |          |          |         |          |          | -27.3    | 0.2      | 0.0      |          |          |          |
| F 2s  | -26.6   | 0.6      | 0.1      | -26.6   | 0.5      | 0.0      | -26.3   | 0.4      | 0.1      | -26.1    | 0.4      | 0.1      | -25.6    | 0.4      | 0.1      |
| Na 2p |         |          |          | -26.6   | 0.5      | 0.0      |         |          |          |          |          |          |          |          |          |
| Cs 5s |         |          |          |         |          |          |         |          |          |          |          |          | -19.9    | 0.2      | 0.0      |
| K 3p  |         |          |          |         |          |          | -15.1   | 0.2      | 0.0      |          |          |          |          |          |          |
| Rb 4p |         |          |          |         |          |          |         |          |          | -12.0    | 0.6      | 0.0      |          |          |          |
| Cs 5p |         |          |          |         |          |          |         |          |          |          |          |          | -9.3     | 1.5      | 0.1      |
| F 2p  | -8.4    | 2.7      | 0.1      | -8.3    | 2.5      | 0.1      | -8.6    | 2.9      | 0.1      | -8.5     | 2.9      | 0.1      | -9.3     | 4.5      | 0.1      |
| V t2g | -0.7    | 0.7      | 5.9      | -0.8    | 0.8      | 5.1      | -1.0    | 1.0      | 8.7      | -1.0     | 1.0      | 7.6      | -0.8     | 0.8      | 7.4      |
| V eg  | 4.5     | 0.5      | 8.8      | 4.1     | 1.0      | 4.1      | 4.3     | 0.9      | 11.7     | 4.2      | 0.9      | 6.2      | 4.2      | 0.9      | 5.8      |
| Na 3s |         |          |          | 4.1     | 3.5      | -2.0     |         |          |          |          |          |          |          |          |          |
| Li 2s | 6.1     | 1.8      | -1.0     |         |          |          |         |          |          |          |          |          |          |          |          |
| F 3s  | 6.1     | 1.8      | 0.3      | 5.6     | 2.0      | 5.7      | 6.0     | 2.6      | 0.9      | 9.3      | 1.5      | 0.7      | 8.9      | 1.5      | 0.6      |
| Rb 5s |         |          |          |         |          |          |         |          |          | 12.1     | 1.5      | -0.7     |          |          |          |
| Cs 5s |         |          |          |         |          |          |         |          |          |          |          |          | 8.9      | 1.5      | 0.6      |

TABLE VII. B3LYP FM core and valence eigenvalues (and lowest conduction ones) for the [Li-Cs]VF<sub>3</sub> system in the most stable structure.  $\delta$  is the width of the band.  $\Delta$  (in  $\mu E_h$ ) is the maximum difference between the  $\beta$  and  $\alpha$  eigenvalues. The horizontal line separates the occupied from the virtual levels.
